# Supplementary material for: Prevalence of measles antibodies among migrant workers in Singapore: a serological study to identify susceptible population subgroups
Source: Springer Nature journal article supplement (doi:10.1186/s12879-022-07066-2), 2022-01-25
Supplement: MOESM1 [file 20067512]

# Prevalence of measles antibodies among migrant workers in Singapore: a serological study to identify susceptible population subgroups

Li Wei Ang, Qi Gao, Lin Cui, Aysha Farwin, Matthias Paul Han Sim Toh, Irving Charles Boudville, Mark I–Cheng Chen, Angela Chow, Raymond Tzer–Pin Lin,  
Vernon Jian Ming Lee, Yee Sin Leo

**Fig. S1.** Annual incidence of reported measles cases in Singapore, 2000–2018

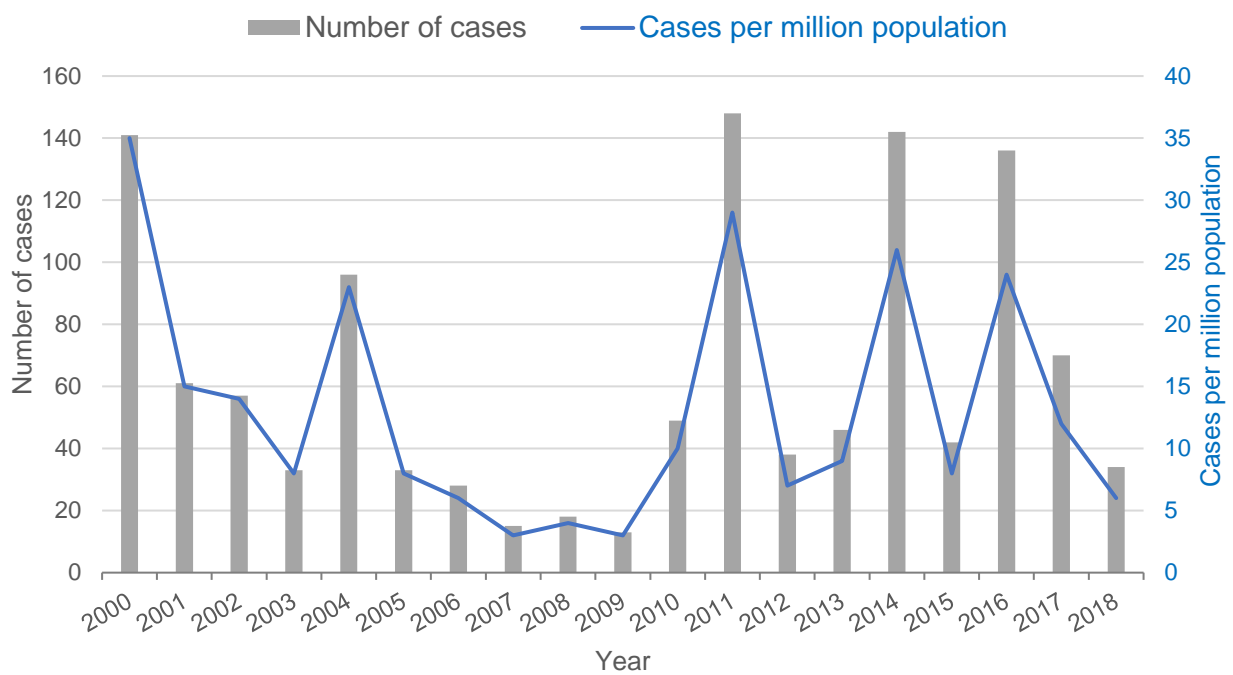

**Table S1.** Seroprevalence of measles IgG antibodies in Bangladesh, China, India and Malaysia

| Country        | Period of survey | Study group                                                     | Measles seroprevalence                                                                               |
|----------------|------------------|-----------------------------------------------------------------|------------------------------------------------------------------------------------------------------|
| Bangladesh [1] | 2013             | 342 children aged 12–16 months in Mirzapur town                 | 83.0%                                                                                                |
| China [2]      | 2016             | 3574 participants aged 2 months to 49 years in Shaanxi Province | 85.9%                                                                                                |
| India [3]      | 2017–2018        | 335 adults (mean age: 20.5±1.4 years)                           | 87.2%                                                                                                |
| Malaysia [4]   | 2014–2015        | 1541 participants aged 6–54 years in Seremban                   | 87% in 6–54 year-olds,<br>90% in 6–9 year-olds,<br>74% in 15–24 year-olds,<br>94% in 45–54 year-olds |

## References:

- [1] Hayford KT, Shomik MS, Al-Emran HM, Moss WJ, Bishai D, Levine OS. Measles vaccination coverage estimates from surveys, clinic records, and immune markers in oral fluid and blood: a population-based cross-sectional study. *BMC Public Health*. 2013;13:1211. doi: 10.1186/1471-2458-13-1211.
- [2] Pei L, Yang Y, Zhao X, Zhang S, Yuan L, Liu Y, et al. Identify the susceptibility profile to measles in the general population: serological survey of measles antibodies in Shaanxi province, China, in 2016. *Vaccine*. 2017;35(52):7250–5. doi: 10.1016/j.vaccine.2017.11.012.
- [3] Karade S, Sen S, Sashindran VK, Sharma P, Kanitkar M. Measles, mumps, and rubella: A cross-sectional study of susceptibility to vaccine-preventable diseases among young people in India. *Med J Armed Forces India*. 2019;75(1):70–3. doi: 10.1016/j.mjafi.2018.12.010.
- [4] Hazlina Y, Marlindawati MA, Shamsuddin K. Serological assessment of the establishment of herd immunity against measles in a health district in Malaysia. *BMC Infect Dis*. 2016;16(1):740. doi: 10.1186/s12879-016-2069-y.

**Table S2.** Vaccination schedule and vaccination coverage for measles, and incidence per million population of measles cases in Bangladesh, China, India, Indonesia, Malaysia, Myanmar and the Philippines

| Country     | Year of introduction of childhood measles vaccination |                      | Age recommended (months) for vaccination                                                 |                                                                                                                                | Vaccination coverage |                      |                      | Incidence per million population in 2010–2019 |                     |
|-------------|-------------------------------------------------------|----------------------|------------------------------------------------------------------------------------------|--------------------------------------------------------------------------------------------------------------------------------|----------------------|----------------------|----------------------|-----------------------------------------------|---------------------|
|             | 1 <sup>st</sup> dose                                  | 2 <sup>nd</sup> dose | 1 <sup>st</sup> dose                                                                     | 2 <sup>nd</sup> dose                                                                                                           | Year 1995            | Year 2019            |                      | Average annual rate                           | Highest annual rate |
|             |                                                       |                      |                                                                                          |                                                                                                                                | 1 <sup>st</sup> dose | 1 <sup>st</sup> dose | 2 <sup>nd</sup> dose |                                               |                     |
| Bangladesh  | 1989                                                  | 2012                 | 9.5 (38 weeks)                                                                           |                                                                                                                                | 79%                  | 93%                  | 89%                  | 14.2                                          | 37.7                |
| China       | 1978                                                  | 1986                 | 8                                                                                        | 18                                                                                                                             | 80%                  | 99%                  | 98%                  | 15.7                                          | 38.6                |
| India       | 1985                                                  | 2010                 | 9–12                                                                                     | 16–24                                                                                                                          | 72%                  | 95%                  | 84%                  | 14.9                                          | 26.9                |
| Indonesia   | 1985                                                  | 2004                 | 9, 24                                                                                    | 84                                                                                                                             | 82%                  | 88%                  | 71%                  | 46.0                                          | 89.3                |
| Malaysia    | 1985                                                  | 2005                 | MMR: 9 months for children born July 2015 onwards<br>Measles: 6 months, Sabah State only | MMR: 12 months for children born July 2015 onwards;<br>MR: 84 months as second dose<br>MCV for children born before July 2015. | 86%                  | 97%                  | 87%                  | 38.2                                          | 64.3                |
| Myanmar     | 1990                                                  | 2008                 | 9                                                                                        | 18                                                                                                                             | 82%                  | 84%                  | 80%                  | 26.0                                          | 97.2                |
| Philippines | 1985                                                  | 2009                 | 9–11                                                                                     | 12–15                                                                                                                          | 83%                  | 73%                  | 68%                  | 144.7                                         | 585.5               |

MCV, measles containing vaccine, MMR, measles–mumps–rubella; MR, measles–rubella

Data sources:

World Health Organization. WHO vaccine–preventable diseases: monitoring system. 2020 global summary. Last updated 15 July 2020. Available at [https://apps.who.int/immunization\\_monitoring/globalsummary](https://apps.who.int/immunization_monitoring/globalsummary). Accessed 3 April 2021.

World Health Organization. Measles reported cases. Last update: 15–Oct–2020 (data received as of 12–Oct–20).

[https://apps.who.int/immunization\\_monitoring/globalsummary/timeseries/tsincidenceiphtheria.html](https://apps.who.int/immunization_monitoring/globalsummary/timeseries/tsincidenceiphtheria.html). Accessed 9 April 2021.

**Table S3.** Number and percentage of samples tested positive based on ELISA alone and those based on ELISA or PRNT by country of origin, birth cohort and gender

|                          | No. of samples | ELISA positive | ELISA or PRNT positive <sup>^</sup> |
|--------------------------|----------------|----------------|-------------------------------------|
|                          |                | No. (%)        | No. (%)                             |
| <b>All</b>               | 2234           | 2021 (90.5)    | 2216 (99.2)                         |
| <b>Country of origin</b> |                |                |                                     |
| Bangladesh               | 289            | 268 (92.7)     | 285 (98.6)                          |
| China                    | 193            | 176 (91.2)     | 193 (100.0)                         |
| India                    | 679            | 632 (93.1)     | 677 (99.7)                          |
| Indonesia                | 450            | 423 (94.0)     | 446 (99.1)                          |
| Malaysia                 | 152            | 122 (80.3)     | 150 (98.7)                          |
| Myanmar                  | 284            | 232 (81.7)     | 278 (97.9)                          |
| Philippines              | 187            | 168 (89.8)     | 187 (100.0)                         |
| <b>Birth cohort</b>      |                |                |                                     |
| 1965–1984                | 447            | 433 (96.9)     | 445 (99.6)                          |
| 1985–1989                | 541            | 509 (94.1)     | 538 (99.4)                          |
| 1990–1994                | 923            | 803 (87.0)     | 912 (98.8)                          |
| 1995–1999                | 323            | 276 (85.4)     | 321 (99.4)                          |
| <b>Gender</b>            |                |                |                                     |
| Male                     | 1341           | 1218 (90.8)    | 1333 (99.4)                         |
| Female                   | 893            | 803 (89.9)     | 883 (98.9)                          |

ELISA, enzyme-linked immunosorbent assay; PRNT, plaque reduction neutralization test

<sup>^</sup> This group comprised 2021 samples tested positive based on ELISA alone, and 195 samples tested equivocal or negative based on ELISA and subsequently tested positive using PRNT.
